# Supplementary material for: Efficacy of Handwashing with Soap and Nail Clipping on Intestinal Parasitic Infections in School-Aged Children: A Factorial Cluster Randomized Controlled Trial
Source: PLoS Med. 2015 Jun 9;12(6):e1001837. doi: 10.1371/journal.pmed.1001837 (PMC4461173; doi:10.1371/journal.pmed.1001837)
Supplement: S6 Table — (DOCX) [file pmed.1001837.s009.docx]

**S6Table. Pre and post intervention prevalence of *A. lumbricoides* amongschool-aged children.**

|  | | **Post-intervention  *A. lumbricoides* prevalence** | | | **P-value*** |
| --- | --- | --- | --- | --- | --- |
| **No** | **Yes** | **Total** |
| **Pre-intervention  *A. lumbricoides* prevalence** | **No** | 343 | 5 | 348 | 0.064 |
| **Yes** | 14 | 3 | 17 |
| **Total** | 356 | 8 | 365 |

*A McNemar test showed that the pre and post intervention *A. lumbricoides*prevalence change significantly.

*A. lumbricoides* = *Ascaris lumbricoides*

|  |
| --- |
